# Supplementary material for: A facile strategy for manipulating micellar size and morphology through intramolecular cross-linking of amphiphilic block copolymers
Source: Royal Society of Chemistry journal article supplement (doi:10.1039/c7py00646b), 2017-01-01
Supplement: c7py00646b1.pdf [file c7py00646b1.pdf]

## Supporting Information

### Facile strategy for manipulating micellar size and morphology through intramolecular cross-linking of amphiphilic block copolymers

Ryoto Tanaka, Kodai Watanabe, Takuya Yamamoto, Kenji Tajima, Takuya Isono, Toshifumi Satoh

Graduate School of Chemical Sciences and Engineering, and Division of Applied Chemistry, Faculty of  
Engineering, Hokkaido University, Sapporo 060-8628, Japan.

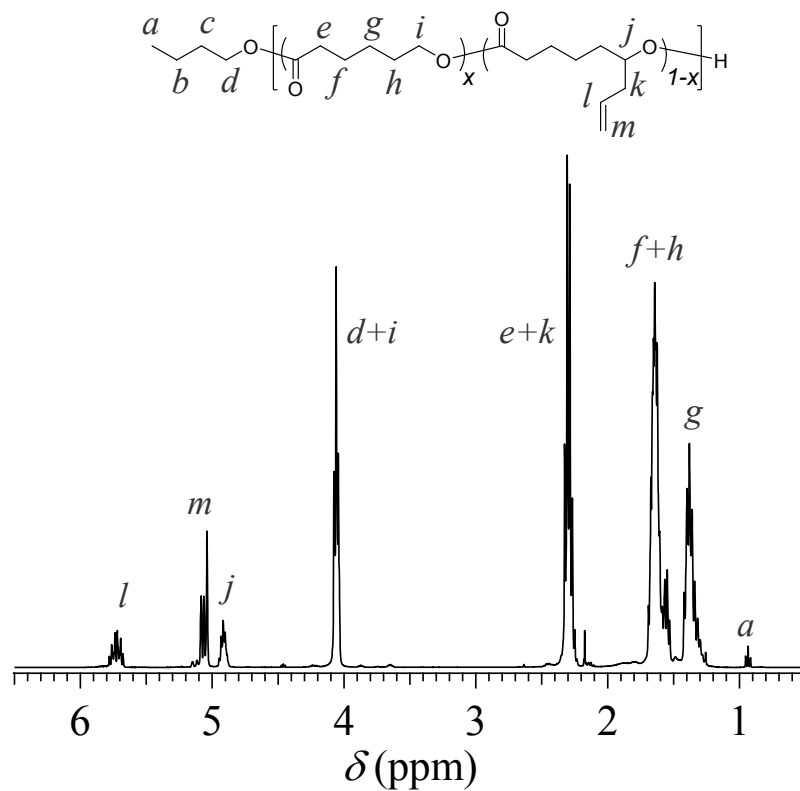

**Figure S1.** <sup>1</sup>H NMR spectrum of **P1** (CDCl<sub>3</sub>, 400 MHz).

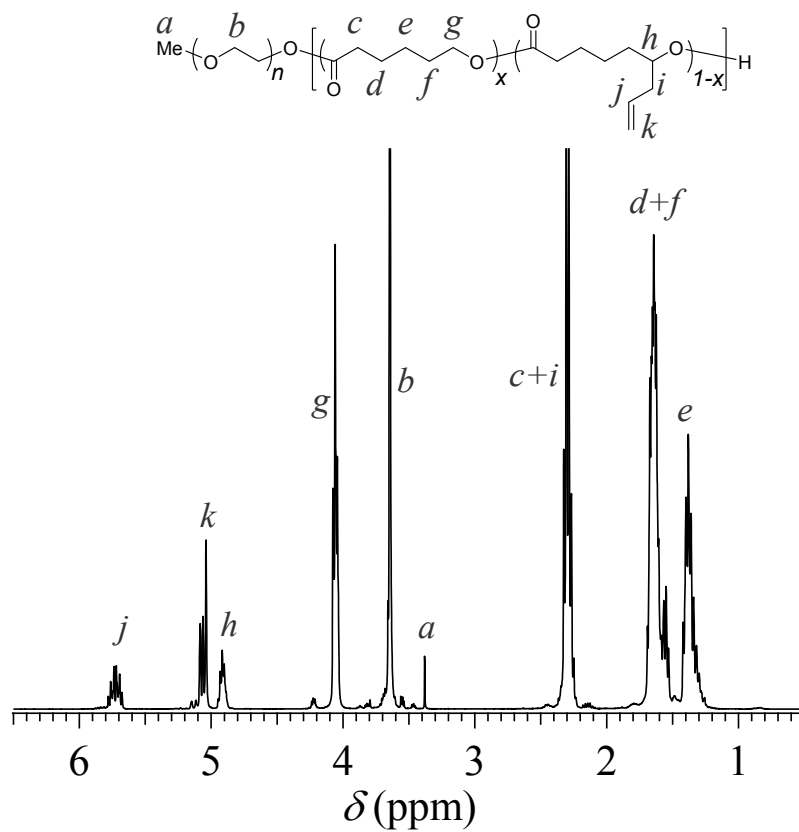

**Figure S2.**  $^1\text{H}$  NMR spectrum of **P2** ( $\text{CDCl}_3$ , 400 MHz).

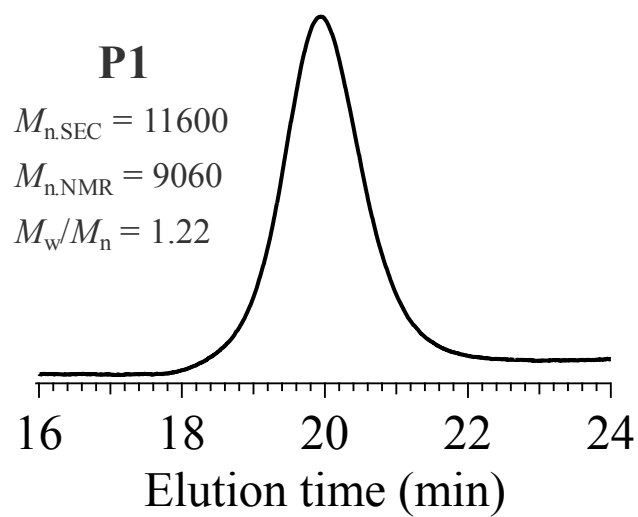

**Figure S3.** SEC trace of **P1** (eluent, DMF containing 0.01 M LiCl; flow rate, 0.6 mL min<sup>-1</sup>).

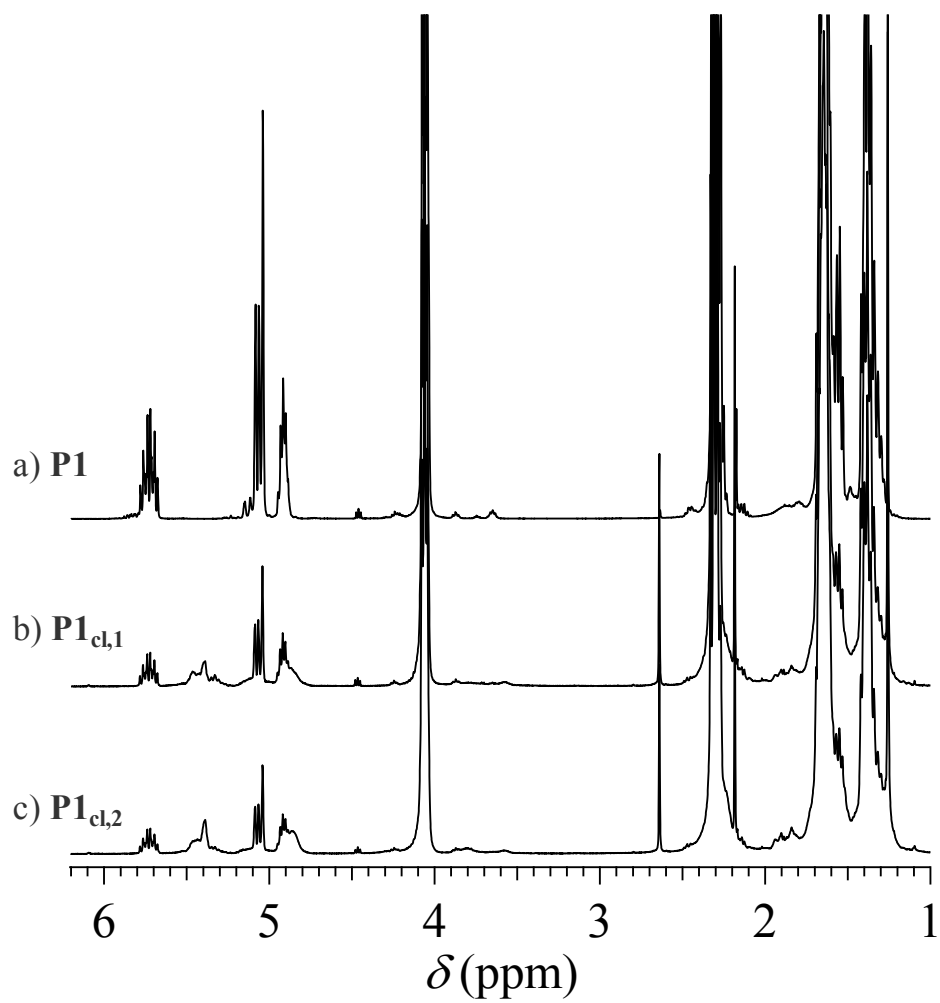

**Figure S4.** <sup>1</sup>H NMR spectra of a) P1, b) P1<sub>cl,1</sub>, and c) P1<sub>cl,2</sub>, respectively (CDCl<sub>3</sub>, 400 MHz).

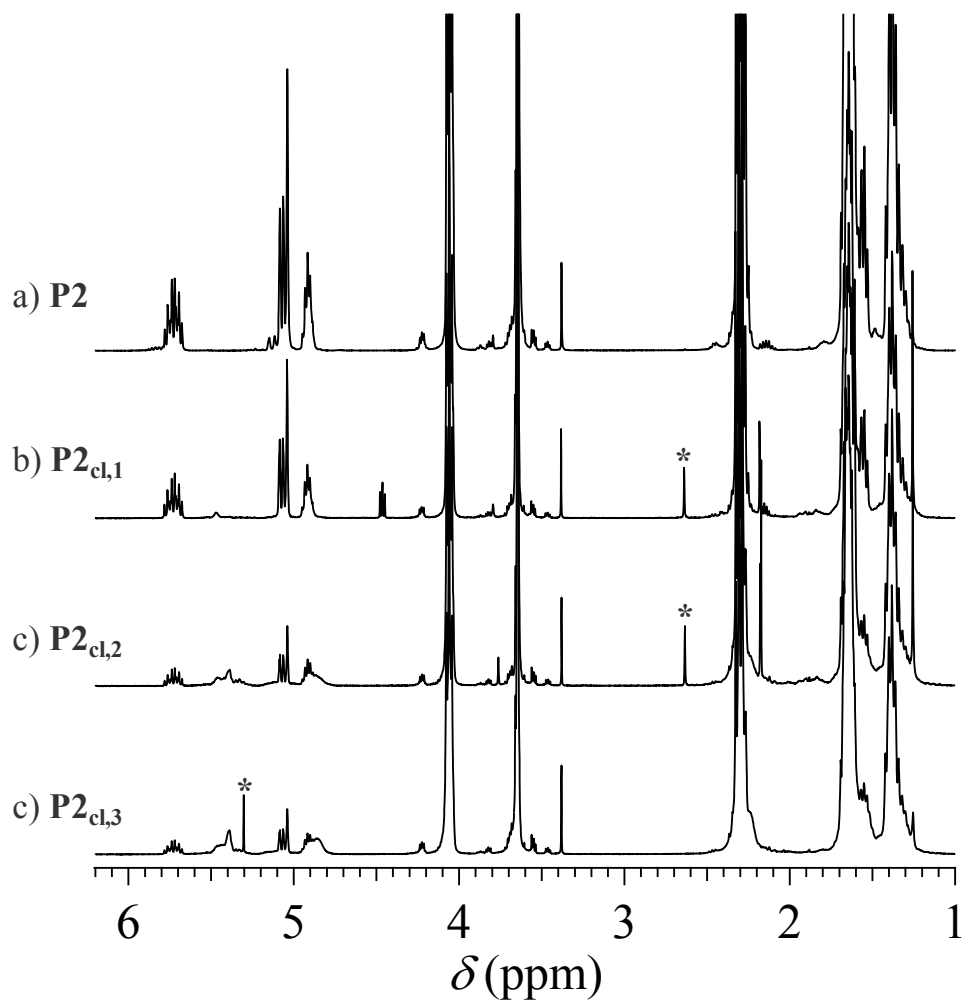

**Figure S5.** <sup>1</sup>H NMR spectra of a) **P2**, b) **P2<sub>cl,1</sub>**, c) **P2<sub>cl,2</sub>**, and d) **P2<sub>cl,3</sub>**, respectively (CDCl<sub>3</sub>, 400 MHz). Asterisks denote residual solvent.

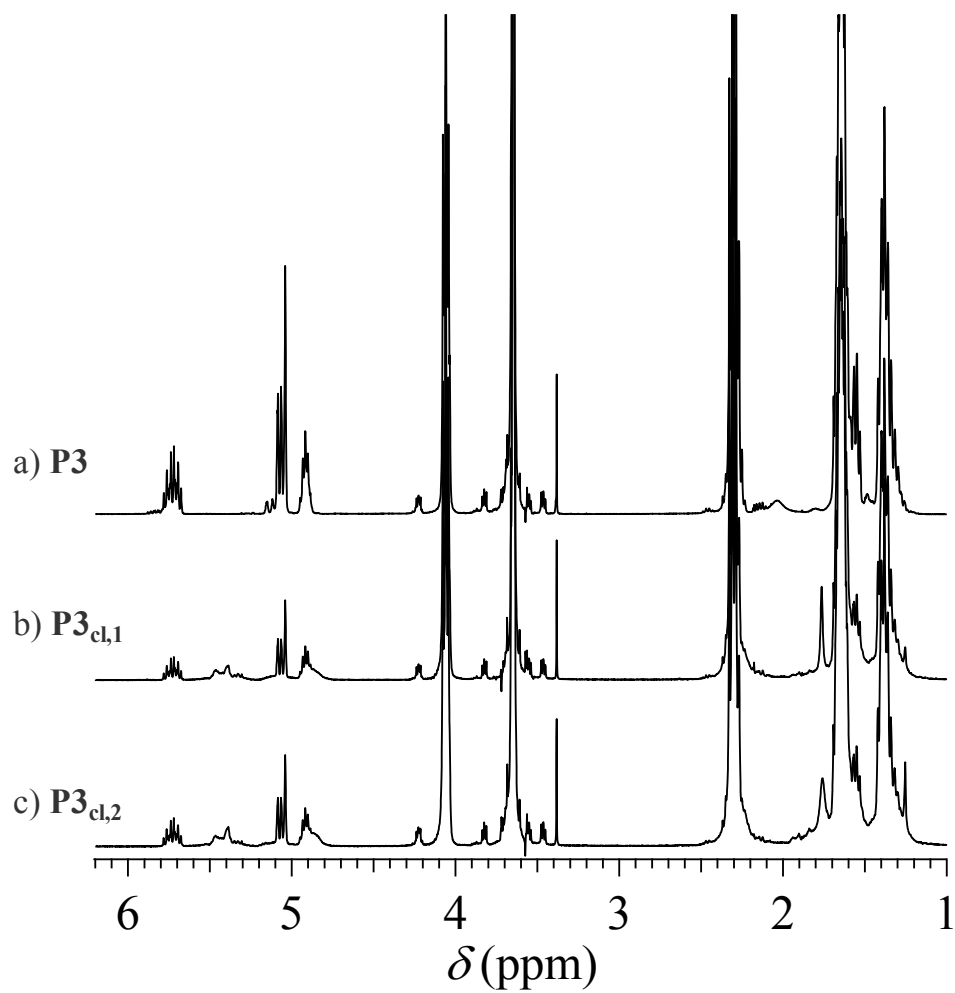

**Figure S6.**  $^1\text{H}$  NMR spectra of a) **P3**, b) **P3<sub>cl,1</sub>**, and c) **P3<sub>cl,2</sub>**, respectively ( $\text{CDCl}_3$ , 400 MHz).

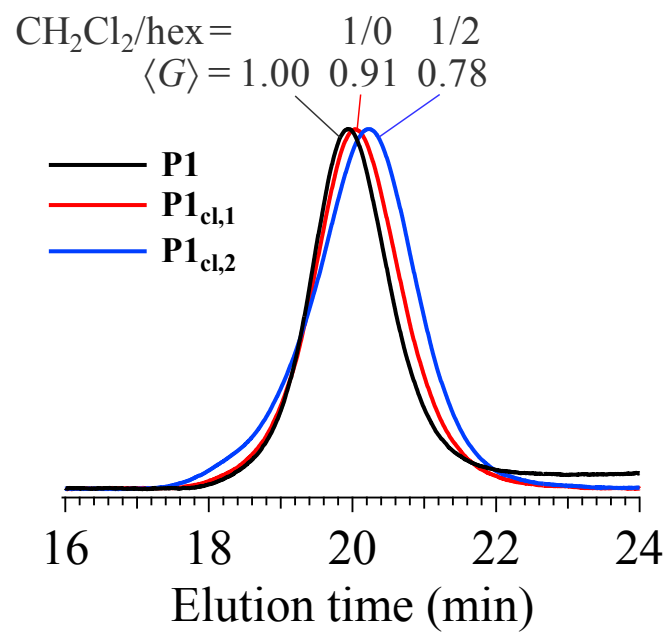

**Figure S7.** SEC traces of **P1** (black), **P1<sub>cl,1</sub>** (red), and **P1<sub>cl,2</sub>** (blue) (eluent, DMF containing 0.01 M LiCl; flow rate, 0.6 mL min<sup>-1</sup>).



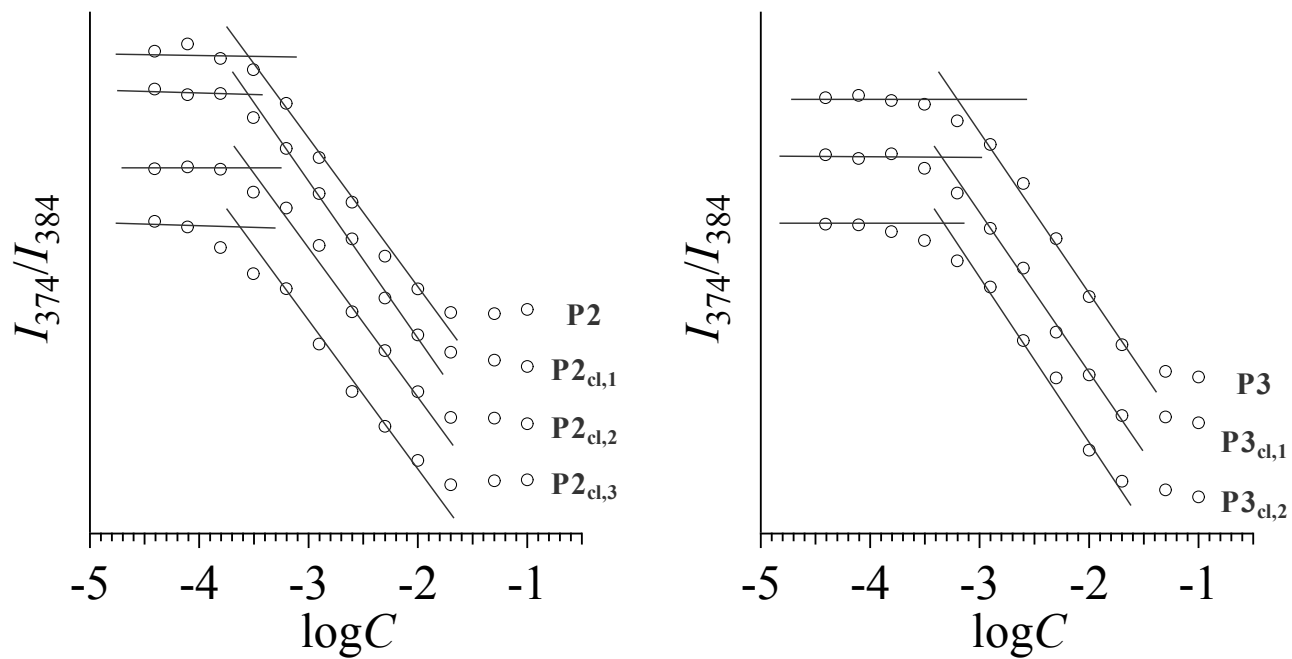

**Figure S8.** Plot of  $I_{374}/I_{384}$  versus  $\log C$  for (left) **P2**, **P2<sub>cl,1</sub>**, **P2<sub>cl,2</sub>**, and **P2<sub>cl,3</sub>**, and (right) **P3**, **P3<sub>cl,1</sub>**, and **P3<sub>cl,2</sub>** at 15 °C.

**Table S1.** Thermal properties, critical micelle concentration (CMC), and hydrodynamic diameter ( $D_h$ ) of self-assemblies.

| polymer                  | $T_{g,P(CL-co-ACL)}^a$<br>(°C) | $T_m^a$ (°C) |      | $D_h^b$<br>(nm) | CMC <sup>c</sup><br>(mg L <sup>-1</sup> ) |
|--------------------------|--------------------------------|--------------|------|-----------------|-------------------------------------------|
|                          |                                | P(CL-co-ACL) | PEG  |                 |                                           |
| <b>P1</b>                | -68.8                          | 14.4         | -    | -               | -                                         |
| <b>P1<sub>cl,1</sub></b> | -64.9                          | n.d.         | -    | -               | -                                         |
| <b>P1<sub>cl,2</sub></b> | -61.9                          | n.d.         | -    | -               | -                                         |
| <b>P2</b>                | -66.4                          | 3.9          | 35.1 | 36.6            | 0.38                                      |
| <b>P2<sub>cl,1</sub></b> | -63.9                          | n.d.         | 33.6 | 26.2            | 0.45                                      |
| <b>P2<sub>cl,2</sub></b> | -57.8                          | n.d.         | 37.7 | 16.7            | 0.44                                      |
| <b>P2<sub>cl,3</sub></b> | -54.0                          | n.d.         | 36.9 | 20.1            | 0.41                                      |
| <b>P3</b>                | -66.7                          | 3.3          | 52.7 | 13.0            | 0.76                                      |
| <b>P3<sub>cl,1</sub></b> | -54.1                          | n.d.         | 51.6 | 16.3, 69.5      | 0.63                                      |
| <b>P3<sub>cl,2</sub></b> | -53.0                          | n.d.         | 51.8 | 19.0, 114       | 0.66                                      |

<sup>a</sup> Determined by DSC measurements at the heating and cooling rates of 10 °C min<sup>-1</sup>. <sup>b</sup> Determined by DLS measurement in water (concentration, 0.1 g L<sup>-1</sup>; temperature, 25 °C). <sup>c</sup> Determined by steady-state fluorescence method using pyrene as a probe at 15 °C. <sup>d</sup> Not determined.
